# Supplementary material for: Scaling-up essential neuropsychiatric services in Ethiopia: a cost-effectiveness analysis
Source: PubMed Central journal article supplement (PMC4986243; doi:10.1093/heapol/czv093), 2015-10-21
Supplement: supp_czv093_Appendix.pdf [file supp_czv093_Appendix.pdf]

Table S1

| Treatment                                     | Drug/ other treatment*                                                                           | Patient adherence | Provider adherence | % at inpatient care (average number of days) | % at residential care (average number of days) | % at outpatient care (average number of visits) | % in primary care (average number of visits) | Psychotherapy (average number of session of 30 min) | % of case-management** | Laboratory tests                                                                  | EEG  |
|-----------------------------------------------|--------------------------------------------------------------------------------------------------|-------------------|--------------------|----------------------------------------------|------------------------------------------------|-------------------------------------------------|----------------------------------------------|-----------------------------------------------------|------------------------|-----------------------------------------------------------------------------------|------|
| <b>Depression</b>                             |                                                                                                  |                   |                    |                                              |                                                |                                                 |                                              |                                                     |                        |                                                                                   |      |
| Treatment with older Antidepressants (TCA)    | Amtriptyline (100 mg daily)                                                                      | 47 %              | 70 %               | 5,8 % (9,8 days)                             |                                                | 22 % (5,4 visits)                               | 100% (5,8 visits)                            | 0 %                                                 | 0 %                    | 83% (TSH, FT4, creatinin, glucose, Hb, ALAT)                                      |      |
| Treatment with newer Antidepressants (SSRI)   | Fluoxetine( 20 mg daily)                                                                         | 50 %              | 80 %               | 5,8 % (9,8 days)                             |                                                | 22 % (5,4 visits)                               | 100% (5,8 visits)                            | 0 %                                                 | 0 %                    | 83% (TSH, FT4, creatinin, glucose, Hb, ALAT)                                      |      |
| Psychotherapy                                 | Cognitive therapy (16-20 hours)                                                                  | 50 %              | 80 %               | 5,8 % (9,8 days)                             |                                                | 22 % (5,4 visits)                               | 100% (5,8 visits)                            | 90 % (16,4 sessions)                                | 0 %                    | 83% (TSH, FT4, creatinin, glucose, Hb, ALAT)                                      |      |
| Combination of AD and psychotherapy           | Amtriptyline / Fluoxetine, cognitive therapy                                                     | 50%/53%           | 80%/90%            | 5,8 % (9,8 days)                             |                                                | 22 % (5,4 visits)                               | 100% (5,8 visits)                            | 90 % (16,4 sessions)                                | 0 %                    | 83% (TSH, FT4, creatinin, glucose, Hb, ALAT)                                      |      |
| Proactive care                                | Amtriptyline / Fluoxetine, cognitive therapy                                                     | 53%/53%           | 85%/90%            | 3,6 % (6,3 days)                             |                                                | 13,5 % (3,6 visits)                             | 100 % (4,40 visits)                          | 52,5 % (10,8 sessions)                              | 90 % (4,8 visits)      | 83% (TSH, FT4, creatinin, glucose, Hb, ALAT)                                      |      |
| <b>Schizophrenia</b>                          |                                                                                                  |                   |                    |                                              |                                                |                                                 |                                              |                                                     |                        |                                                                                   |      |
| Older antipsychotics                          | Chlorpromazine 300 mg daily/Fluphenazine deconate 25 mg daily                                    | 47 %              | 80 %               | 50% (35,3 days)                              | 5,5 % ( 84 days)                               | 50 % (4,5 visits)                               | 50 % ( 4,2 visits)                           | 0 %                                                 | 0 %                    | 100% (2 tests of fasting glucose, weigh) 23% (CBC package)                        |      |
| Newer antipsychotics                          | Risperidone 4 mg daily                                                                           | 53 %              | 80 %               | 50% (32,4 days)                              | 5,5 % ( 84 days)                               | 50 % (4,5 visits)                               | 50 % ( 4,2 visits)                           | 0 %                                                 | 0 %                    | 100% (2 tests of fasting glucose, weigh, CBC package)                             |      |
| Older antipsychotics + psychosocial treatment | Chlorpromazine 100 mg daily/Fluphenazine deconate 25 mg daily, supportive psychosocial treatment | 50 %              | 80 %               | 46,5% (32,4 days)                            | 5,5 % ( 84 days)                               | 50 % (4,5 visits)                               | 50 % ( 4,2 visits)                           | 77 % (7,2 sessions of 30 min)                       | 0 %                    | 100% (2 tests of fasting glucose, weigh) 23% (CBC package)                        |      |
| Newer antipsychotics + psychosocial treatment | Risperidone 4mg daily, supportive psychosocial treatment                                         | 57 %              | 80 %               | 46,5% (32,4 days)                            | 5,5 % ( 84 days)                               | 50 % (4,5 visits)                               | 50 % ( 4,2 visits)                           | 77 % (7,2 sessions of 30 min)                       | 0 %                    | 100% (2 tests of fasting glucose, weigh, CBC package)                             |      |
| Case-management with older antipsychotics     | Chlorpromazine 300 mg daily/Fluphenazine deconate 25 mg daily                                    | 60 %              | 80 %               | 44,8 % (32,4 days)                           | 5,5 % ( 84 days)                               | 50 % (4,5 visits)                               | 50 % ( 4,2 visits)                           | 77 % (7,2 sessions of 30 min)                       | 58,8 % (9,0 visits)    | 100% (2 tests of fasting glucose, weigh) 23% (CBC package)                        |      |
| Case-management with newer antipsychotics     | Risperidone 4 mg daily                                                                           | 60 %              | 80 %               | 44,8 % (32,4 days)                           | 5,5 % ( 84 days)                               | 50 % (4,5 visits)                               | 50 % ( 4,2 visits)                           | 77 % (7,2 sessions of 30 min)                       | 58,8 % (9,0 visits)    | 100% (2 tests of fasting glucose, weigh, CBC package)                             |      |
| <b>Bipolar Disorder</b>                       |                                                                                                  |                   |                    |                                              |                                                |                                                 |                                              |                                                     |                        |                                                                                   |      |
| Older Mood Stabilizer                         | Lithium Carbonate                                                                                | 43 %              | 80 %               | 12,5% ( 7,0 days)                            | 3,1% ( 28,1 days)                              | 100% (3,5 visits)                               | 50 % (2,3 visits)                            | 0 %                                                 |                        | 100% ( 4 tests p-Lithium, 1 test; TSH, FT4, creatinin and electrolytes)           |      |
| Newer Mood Stabilizer                         | Sodium Valproate                                                                                 | 48 %              | 80 %               | 12,5% ( 6,0 days)                            | 3,1% ( 28,1 days)                              | 100% (3,5 visits)                               | 50 % (2,3 visits)                            | 0 %                                                 |                        | 100% (creatinin, ALAT, ASAT, CBC with plt) 50% ( TSH, FT4)                        |      |
| Older Mood Stabilizer + psychosocial          | Lithium Carbonate + supportive psychosocial treatment                                            | 48 %              | 80 %               | 11,3% (7,0 days)                             | 3,1% ( 28,1 days)                              | 100% (3,5 visits)                               | 50 % (2,3 visits)                            | 100 % (6,5 sessions of 30 minutes)                  |                        | 100% ( 4 tests p-Lithium, 1 test; TSH, FT4, creatinin and electrolytes)           |      |
| Newer Mood Stabilizer + psychosocial          | Sodium Valproate + supportive psychosocial treatment                                             | 52 %              | 80 %               | 11,3 % (6,0 days)                            | 3,1% ( 28,1 days)                              | 100% (3,5 visits)                               | 50 % (2,3 visits)                            | 100 % (6,5 sessions of 30 minutes)                  |                        | 100% (creatinin, ALAT, ASAT, CBC with plt) 50% ( TSH, FT4)                        |      |
| <b>Epilepsy</b>                               |                                                                                                  |                   |                    |                                              |                                                |                                                 |                                              |                                                     |                        |                                                                                   |      |
| Older antiepileptic                           | Phenobarbital 100 mg daily                                                                       | 70 %              | 90 %               | 3% (5 days)                                  |                                                | 25% (4 visits)                                  | 100 % (2 days)                               |                                                     |                        | 100% (Liver tests***, CBC package)                                                | 50 % |
| Newer antiepileptic                           | Carbamazepine 600 mg daily                                                                       | 70 %              | 90 %               | 3% (5 days)                                  |                                                | 25% (4 visits)                                  | 100 % (2 days)                               |                                                     |                        | 100% (CBC package, plt, s-I, Liver test***, BUN, Urinalysis, thyroid tests, s-Na) | 50 % |

\*Active treatment with antidepressants and psychotherapy is given to patients with moderate to severe depression. Mild depression is handled in primary care. Evidence shows no effect of medical treatment for mild depression.

\*\* Depression: maintenance treatment and follow-up to prevent relapse. Schizophrenia: case-finding of patients and extra follow-up.

\*\*\* Liver tests include: bil-tot, bil-dir, ASAT, ALAT and ALP
