# Supplementary material for: Scaling-up essential neuropsychiatric services in Ethiopia: a cost-effectiveness analysis
Source: PubMed Central journal article supplement (PMC4986243; doi:10.1093/heapol/czv093), 2015-10-21
Supplement: supp_czv093_TableS2.pdf [file supp_czv093_TableS2.pdf]

Table S2

|                  |                     | Patient-related unit costs (in million US\$) |                 |              |                   |            |                 | Administrative costs (in million US\$) |               | Total costs     |            |
|------------------|---------------------|----------------------------------------------|-----------------|--------------|-------------------|------------|-----------------|----------------------------------------|---------------|-----------------|------------|
| Disease Category | Intervention number | Inpatient care                               | Outpatient care | Primary Care | Psychosocial care | Drug costs | Labratory costs | Program costs                          | Traning costs | In million US\$ | per capita |
| Depression       | DEP1                | 0.78                                         | 0.54            | 3.36         | 0.00              | 1.33       | 4.86            | 0.20                                   | 0.35          | 11.44           | 0.13       |
|                  | DEP2                | 0.78                                         | 0.54            | 3.34         | 0.00              | 3.24       | 4.84            | 0.20                                   | 0.35          | 13.31           | 0.15       |
|                  | DEP3                | 0.78                                         | 0.54            | 3.34         | 38.42             | 0.00       | 4.84            | 0.20                                   | 0.77          | 48.90           | 0.56       |
|                  | DEP4                | 0.77                                         | 0.53            | 3.31         | 38.03             | 1.14       | 4.79            | 0.20                                   | 1.18          | 49.97           | 0.58       |
|                  | DEP5                | 0.77                                         | 0.53            | 3.29         | 37.74             | 2.78       | 4.76            | 0.20                                   | 1.18          | 51.24           | 0.59       |
|                  | DEP6                | 0.29                                         | 0.21            | 3.04         | 33.28             | 2.69       | 3.46            | 0.43                                   | 1.15          | 44.55           | 0.51       |
|                  | DEP7                | 0.29                                         | 0.21            | 3.03         | 33.11             | 5.55       | 3.44            | 0.43                                   | 1.15          | 47.21           | 0.54       |
| Schizophrenia    | SCZ1                | 12.91                                        | 0.51            | 0.66         | 0.00              | 1.46       | 0.42            | 0.39                                   | 0.49          | 16.83           | 0.19       |
|                  | SCZ2                | 12.05                                        | 0.51            | 0.66         | 0.00              | 1.48       | 1.26            | 0.39                                   | 0.49          | 16.83           | 0.19       |
|                  | SCZ3                | 11.39                                        | 0.51            | 0.66         | 1.94              | 1.46       | 0.42            | 0.39                                   | 0.98          | 17.75           | 0.20       |
|                  | SCZ4                | 11.39                                        | 0.51            | 0.66         | 1.94              | 1.48       | 1.26            | 0.39                                   | 0.98          | 18.60           | 0.21       |
|                  | SCZ5                | 11.06                                        | 0.51            | 0.66         | 4.72              | 1.46       | 0.42            | 0.93                                   | 1.47          | 21.22           | 0.24       |
|                  | SCZ6                | 11.06                                        | 0.51            | 0.66         | 4.72              | 1.48       | 1.26            | 0.93                                   | 1.47          | 22.07           | 0.25       |
| Bipolar disorder | BIP1                | 0.83                                         | 0.65            | 0.28         | 0.00              | 13.00      | 4.83            | 0.29                                   | 0.62          | 20.50           | 0.24       |
|                  | BIP2                | 0.77                                         | 0.65            | 0.28         | 0.00              | 18.71      | 1.58            | 0.29                                   | 0.62          | 22.90           | 0.26       |
|                  | BIP3                | 0.79                                         | 0.65            | 0.28         | 1.79              | 13.01      | 4.83            | 0.29                                   | 2.07          | 23.71           | 0.27       |
|                  | BIP4                | 0.73                                         | 0.65            | 0.28         | 1.79              | 18.73      | 1.58            | 0.29                                   | 2.07          | 26.14           | 0.30       |
| Epilepsy         | EPI1                | 0.40                                         | 1.02            | 4.67         | 0.00              | 1.64       | 12.95           | 0.29                                   | 0.93          | 21.90           | 0.25       |
|                  | EPI2                | 0.40                                         | 1.02            | 2.33         | 0.00              | 17.80      | 25.18           | 0.29                                   | 0.93          | 47.95           | 0.55       |
